# Supplementary material
Source: MDPI journal article supplement (https://www.mdpi.com/2071-1050/12/9/3794)
Supplement: s1 [file s1]

## Supplementary Materials

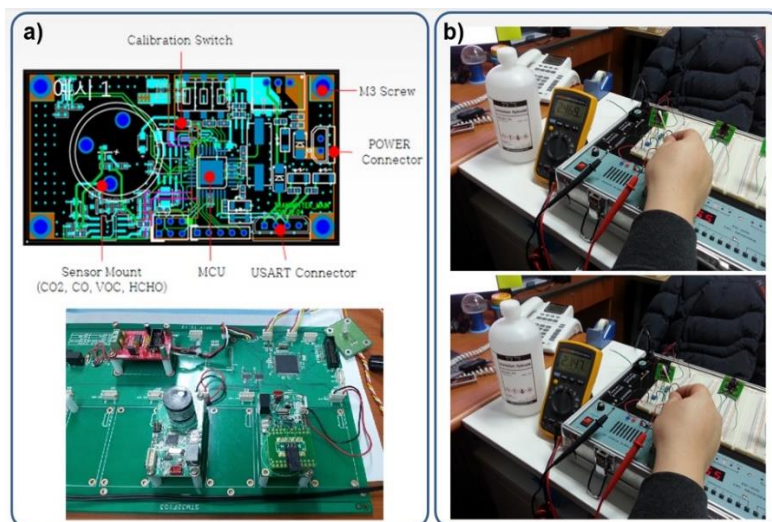

**Figure S1.** Individual sensor module (a) and lab test for indoor pollutants (b).

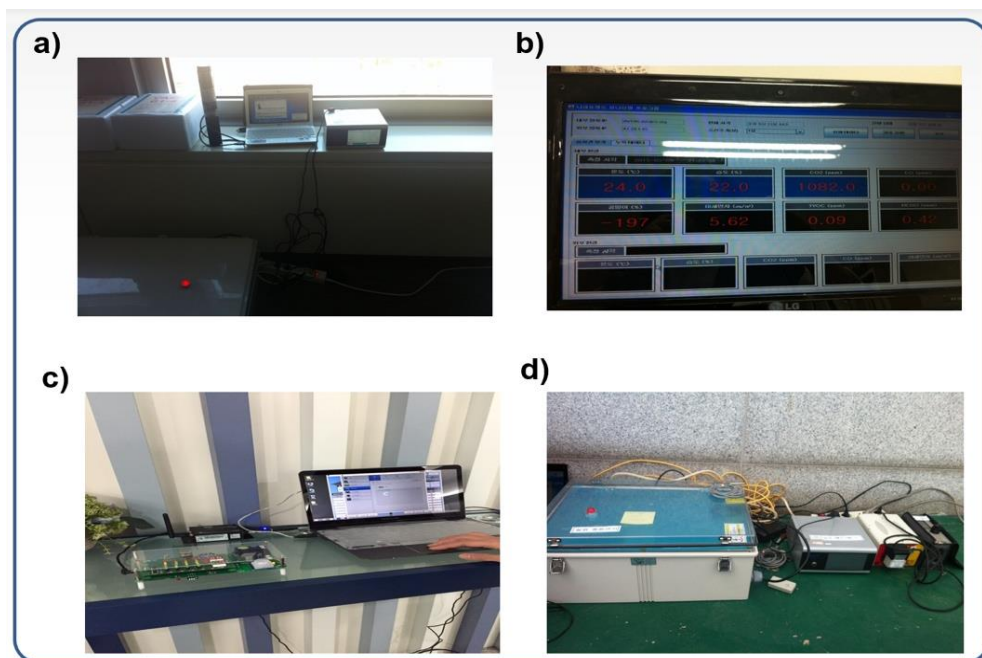

**Figure S2.** Field test using the integrated sensor platform indoors (a, b, c) and in the underground parking garage (d).

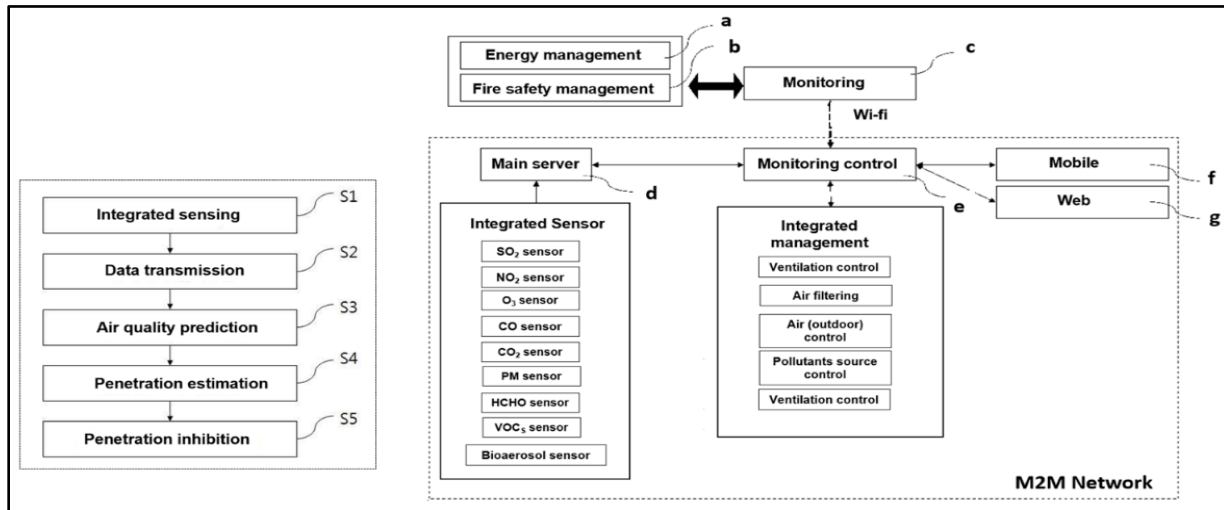

**Figure S3.** Building air quality monitoring (S1–S5) using the integrated sensor platform. Left: block diagram, right: diagram for the indoor air quality management system with an M2M wireless sensor network.

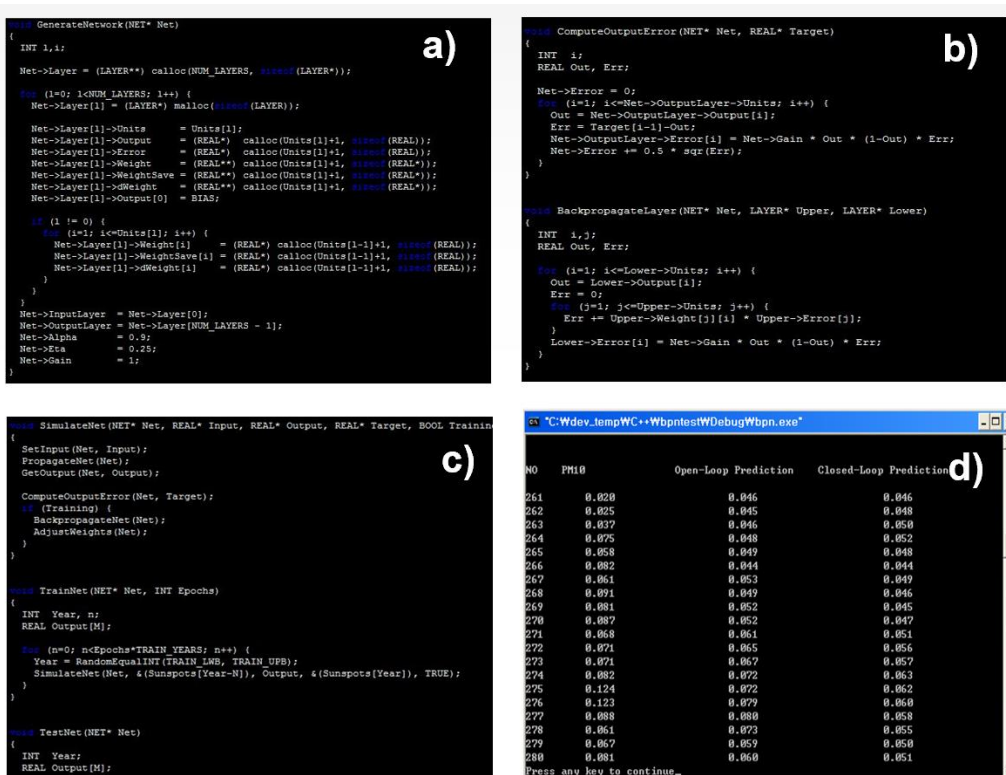

**Figure S4.** Developed prediction program using an Artificial Neural Network (ANN). Initial screen (a), reverse propagation (b), prediction screen (c), and final result (d).
